# Supplementary material for: Promoter Methylation-Regulated miR-145-5p Inhibits Laryngeal Squamous Cell Carcinoma Progression by Targeting FSCN1
Source: PubMed Central journal article supplement — Mol Ther. 2018 Sep 27;27(2):365–79. doi: 10.1016/j.ymthe.2018.09.018 (PMC6369713; doi:10.1016/j.ymthe.2018.09.018), 2018-09-27
Supplement: mmc1.pdf [file mmc1.pdf]

## **Supplemental Information**

### **Promoter Methylation-Regulated miR-145-5p Inhibits Laryngeal Squamous Cell Carcinoma Progression by Targeting *FSCN1***

**Wei Gao, Chunming Zhang, Wenqi Li, Huizheng Li, Jiangwei Sang, Qinli Zhao, Yunfeng Bo, Hongjie Luo, Xiwang Zheng, Yan Lu, Yong Shi, Dongli Yang, Ruiping Zhang, Zhenyu Li, Jiajia Cui, Yuliang Zhang, Min Niu, Jun Li, Zhongqiang Wu, Huina Guo, Caixia Xiang, Juan Wang, Juan Hou, Lu Zhang, Rick F. Thorne, Yongping Cui, Yongyan Wu, Shuxin Wen, and Binqun Wang**

Figure S1

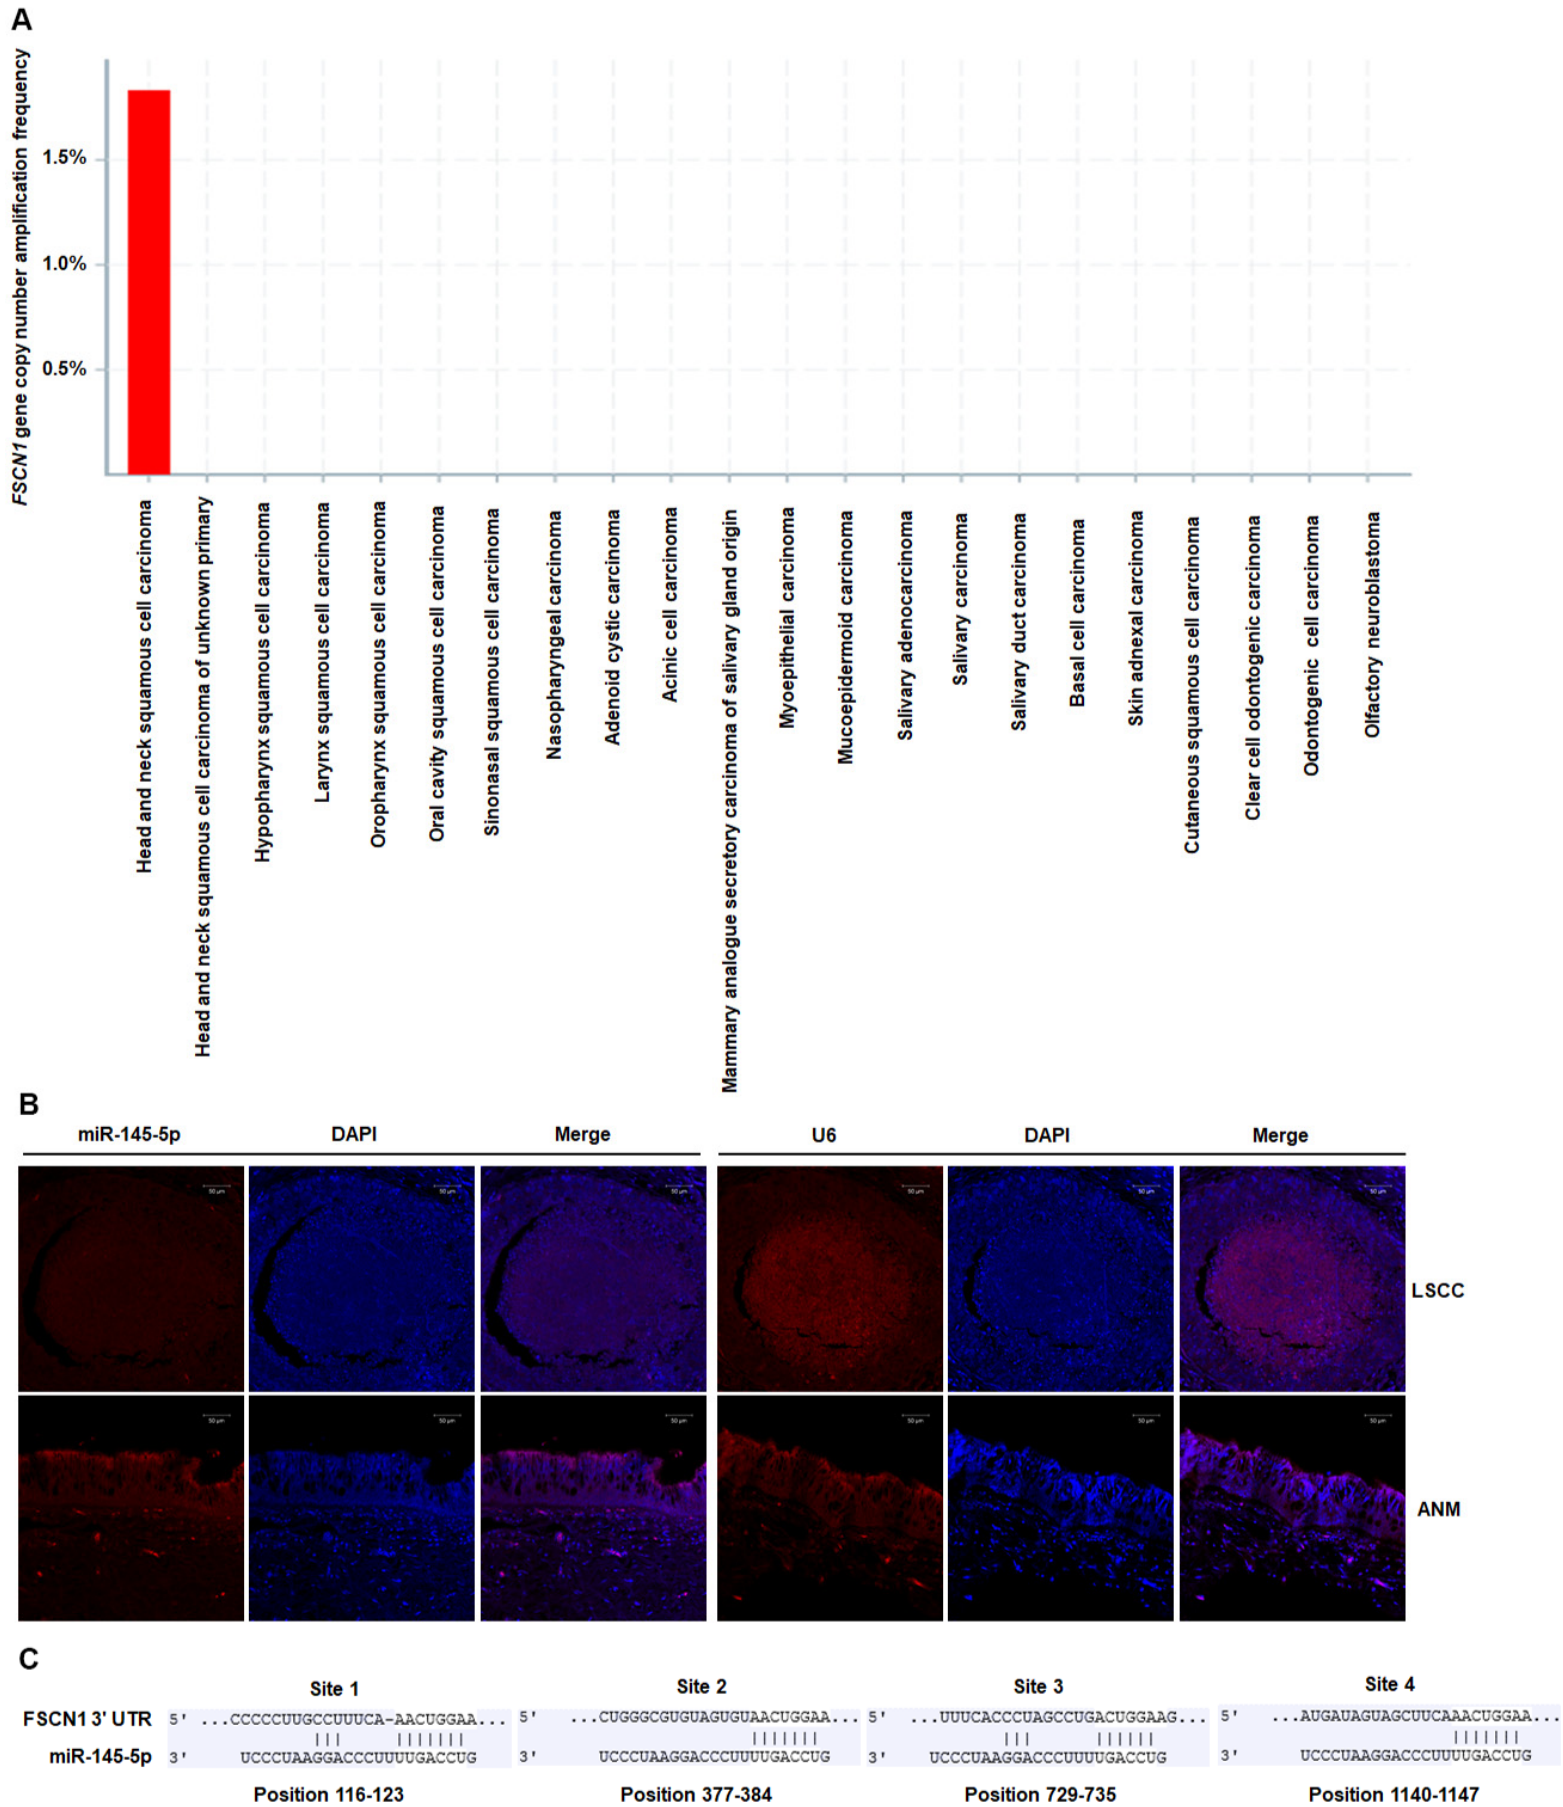

Figure S2

**A**

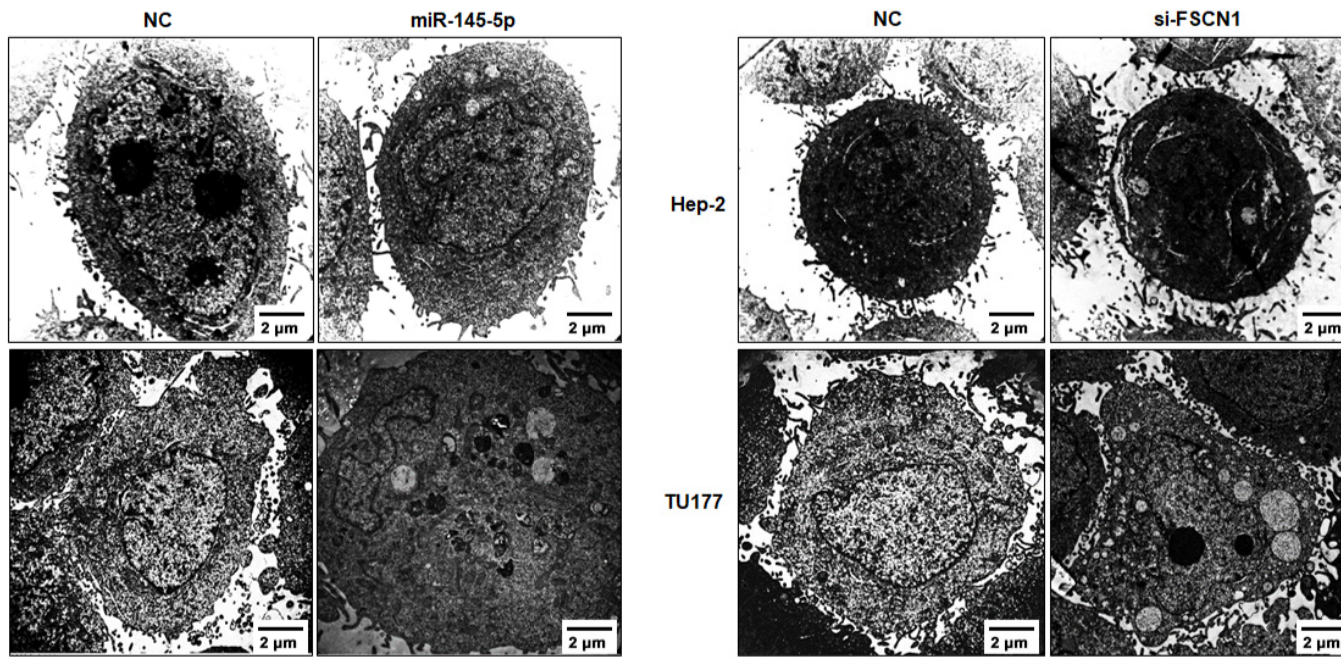

**B**

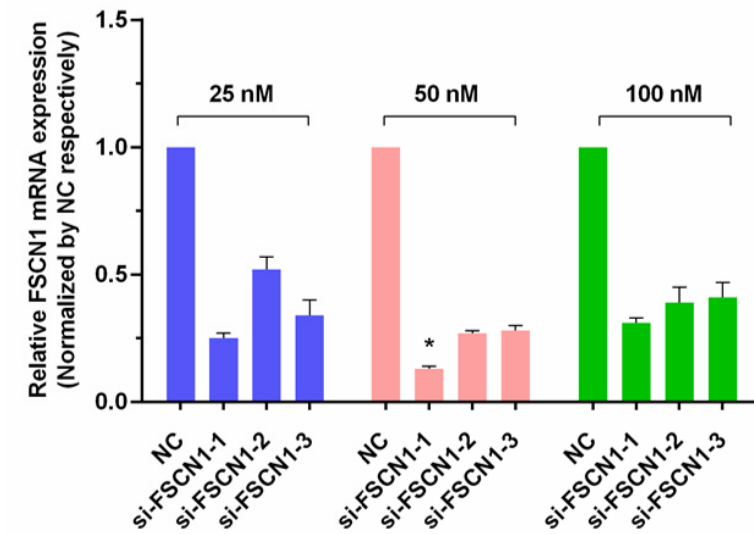

**C**

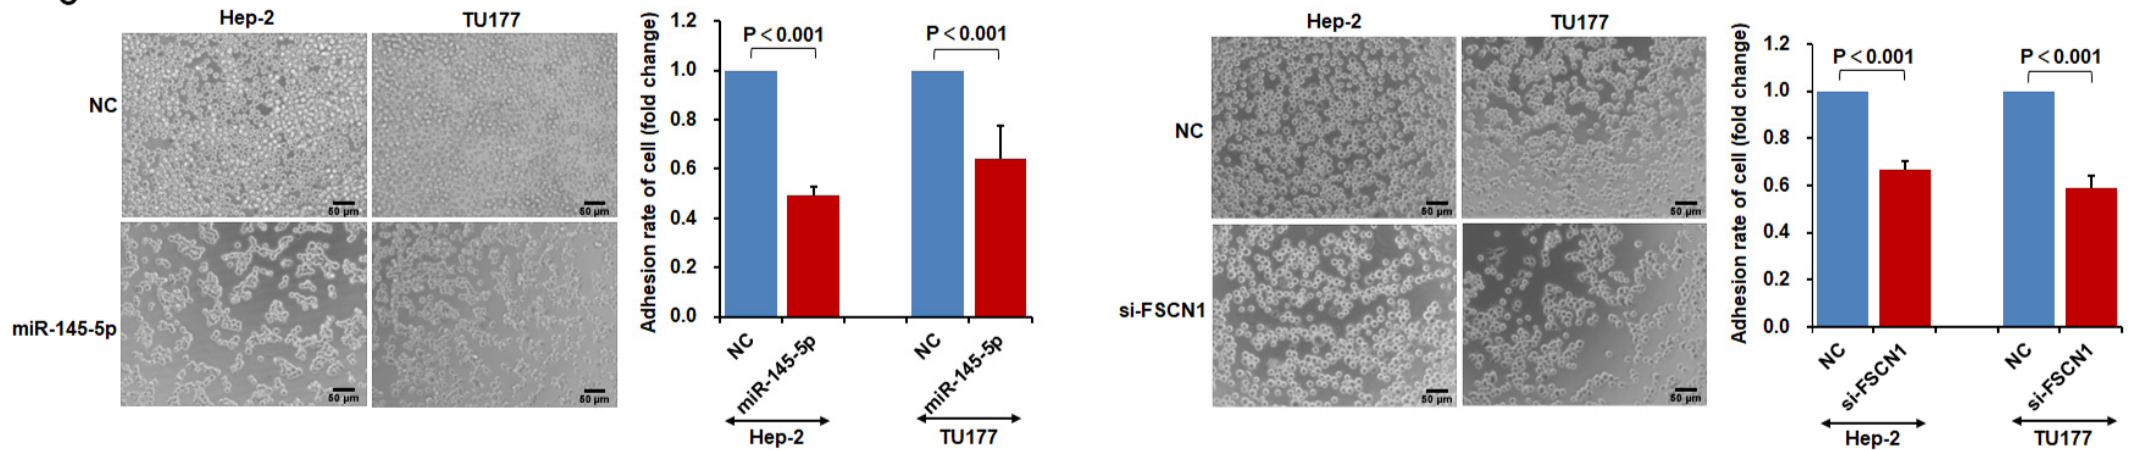



Figure S3

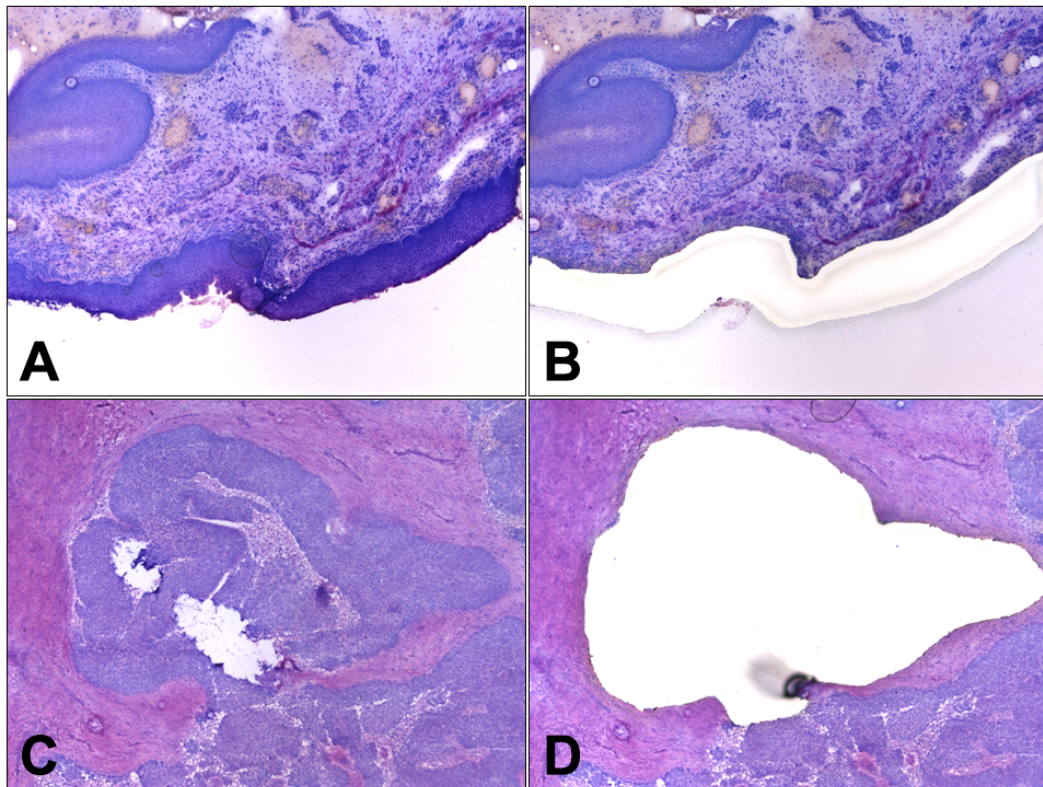

Figure S4

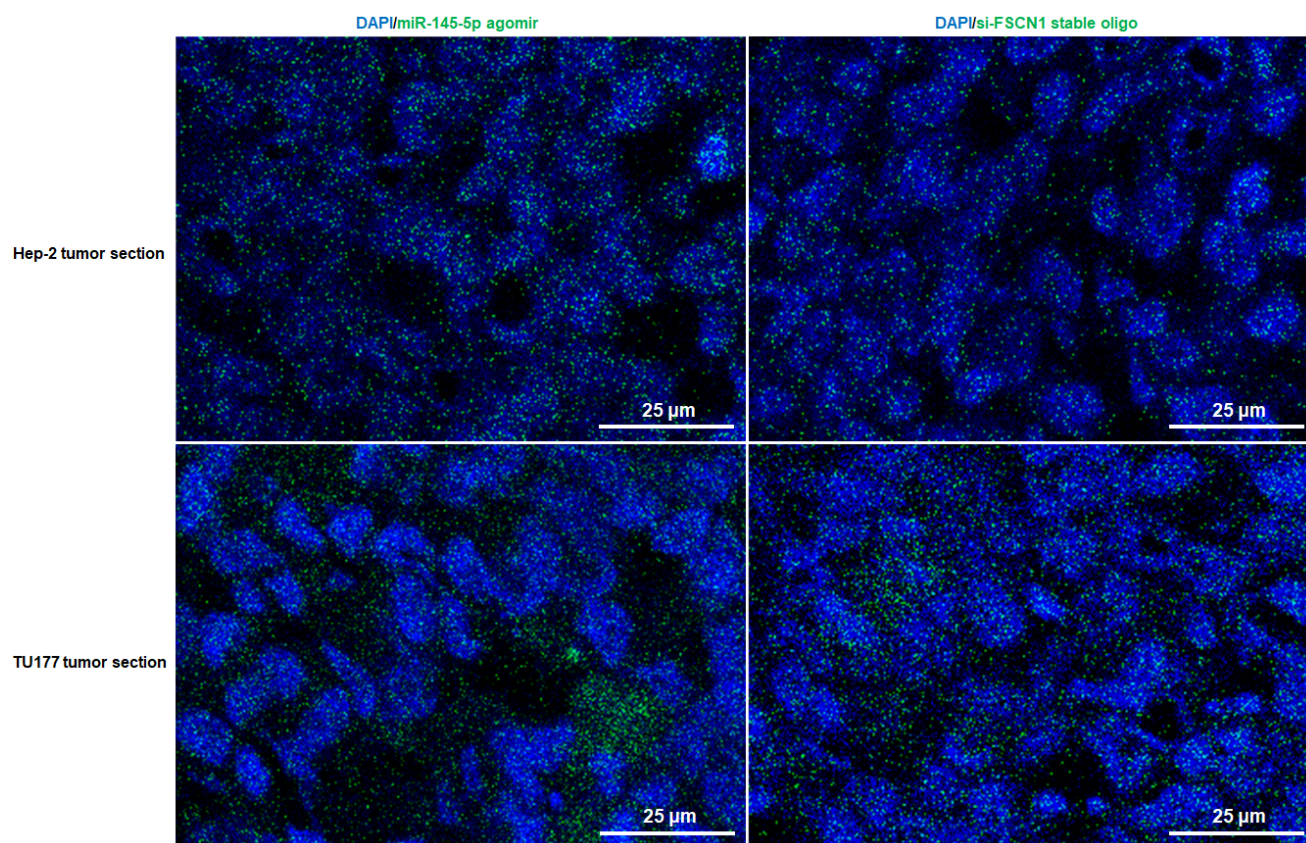

## Supplemental legends

**Figure S1.** (A) Copy number variation analysis of *FSCN1* gene in 1685 head and neck cancer samples (including LSCC) from TCGA dataset performed with cBioPortal v1.13.1 (<http://www.cbioportal.org/index.do>). (B) Fluorescence *in situ* hybridization of miR-145-5p in LSCC and ANM tissue. Expression of U6 RNA was an internal control. (C) Complementary binding sites of miR-145-5p on 3'-UTR of *FSCN1*.

**Figure S2.** (A) Hep-2 and TU177 cells were transfected with miR-145-5p mimic or siRNA oligos targeting *FSCN1* for 48 h; apoptotic bodies were observed by TEM. (B) Screening of *FSCN1* siRNA. qPCR analysis of mRNA level of *FSCN1* in Hep-2 cells transfected with siRNAs targeting 3 different sequences of *FSCN1* mRNA at the indicated concentrations for 48 h. (C) Hep-2 and TU177 cells were transfected with miR-145-5p mimic or siRNA oligos targeting *FSCN1* for 48 h; cell adhesive ability was measured. Data are mean  $\pm$  SD of three independent experiments.

**Figure S3.** Laser capture microdissection (LCM) of LSCC or paired ANM fresh frozen tissues. Representative images of ANM tissue section before (A) and after (B) laser capture microdissection (LCM). Representative images of LSCC fresh tissue sections before (C) and after (D) LCM.

**Figure S4.** Verification of delivery efficiency of RNA oligos injected into xenograft tumors. Hep-2 or TU177 cells were subcutaneously injected into the flanks of BALB/C nude mice to generate xenograft tumors. When the tumors had grown to 0.5 mm<sup>3</sup>, FAM labeled miR-145-5p agomir or *FSCN1* siRNA stable oligos were subcutaneously injected into the tumor site as follows: multi-point injection with 0.1 ml oligos (10 nmol), 2 times/week/position and on the first and fourth day per week. Tumors were separated 96 h after injection, then frozen sections were prepared and observed under confocal laser scanning microscopy. Representative images show distribution and level of miR-145-5p agomir or *FSCN1* siRNA in tumors. The nuclei were stained with DAPI (blue). The miR-145-5p agomir or *FSCN1* siRNA can be seen as green fluorescent dots.

**Supplemental Table S1. Prediction of miRNA targeting FSCN1.** Potential miRNA of FSCN1 was predicted with miRwalk-2, the information of potential binding site was shown in the Excel file.

**Supplemental Table S2. Differentially expressed miRNAs from microarray data of paired LSCC and adjacent normal margin tissues.**

| Gene Name       | P value | Fold Change | Style |
|-----------------|---------|-------------|-------|
| hsa-miR-486-5p  | 0.04    | 8.2         | Down  |
| hsa-miR-204-5p  | <0.001  | 5.02        | Down  |
| hsa-miR-139-5p  | 0.03    | 3.2         | Down  |
| hsa-miR-145-5p  | 0.02    | 2.74        | Down  |
| hsa-miR-1305    | 0.02    | 2.4         | Down  |
| hsa-miR-1225-3p | 0.03    | 2.1         | Down  |
| hsa-miR-21-5p   | 0       | 8.14        | Up    |
| hsa-miR-21-3p   | 0       | 5.76        | Up    |
| hsa-miR-135b-5p | 0.02    | 5.72        | Up    |
| hsa-miR-210     | 0.02    | 5.66        | Up    |
| hsa-miR-130b-3p | <0.001  | 5.17        | Up    |
| hsa-miR-7-5p    | 0.02    | 4.62        | Up    |
| hsa-miR-222-3p  | 0.04    | 3.56        | Up    |
| hsa-miR-19a-3p  | 0.01    | 3.55        | Up    |
| hsa-miR-181b-5p | 0.01    | 3.35        | Up    |
| hsa-miR-106b-5p | 0.01    | 3.3         | Up    |
| hsa-miR-185-5p  | 0.03    | 3.03        | Up    |
| hsa-miR-19b-3p  | 0.02    | 3.01        | Up    |
| hsa-miR-151-3p  | 0.03    | 2.98        | Up    |
| hsa-miR-362-5p  | 0.02    | 2.72        | Up    |
| hsa-miR-93-5p   | <0.001  | 2.61        | Up    |
| hsa-miR-20a-5p  | 0.01    | 2.56        | Up    |
| hsa-miR-425-5p  | 0.01    | 2.52        | Up    |
| hsa-miR-20b-5p  | 0.02    | 2.38        | Up    |
| hsa-miR-374b-5p | 0.04    | 2.36        | Up    |
| hsa-miR-181a-5p | <0.001  | 2.29        | Up    |
| hsa-miR-27a-3p  | 0.03    | 2.28        | Up    |
| hsa-miR-424-5p  | 0.04    | 2.26        | Up    |
| hsa-miR-152     | 0.01    | 2.18        | Up    |

**Supplemental Table S3. Clinical features of 188 LSCC patients.**

| <b>Parameters</b>                       | <b>Number of Cases (%)</b> |
|-----------------------------------------|----------------------------|
| <b>Age</b>                              |                            |
| ≤60                                     | 89 (47.3)                  |
| >60                                     | 99 (52.7)                  |
| <b>Sex</b>                              |                            |
| Female                                  | 21 (11.2)                  |
| Male                                    | 167 (88.8)                 |
| <b>Primary cancer site</b>              |                            |
| Glottic                                 | 101 (53.7)                 |
| Supraglottic                            | 83 (44.1)                  |
| Subglottic                              | 4 (2.1)                    |
| <b>Differentiation</b>                  |                            |
| High                                    | 72 (38.3)                  |
| Medium                                  | 75 (39.9)                  |
| Low                                     | 41 (21.8)                  |
| <b>T staging<sup>1</sup></b>            |                            |
| T1                                      | 53 (28.2)                  |
| T2                                      | 58 (30.9)                  |
| T3                                      | 41 (21.8)                  |
| T4                                      | 36 (19.1)                  |
| <b>Cervical lymph node metastasis</b>   |                            |
| N0                                      | 142 (75.5)                 |
| N+                                      | 46 (24.5)                  |
| <b>Distant metastasis</b>               |                            |
| M0                                      | 183 (97.3)                 |
| M1                                      | 5 (2.7)                    |
| <b>Clinical stage</b>                   |                            |
| I                                       | 51 (27.1)                  |
| II                                      | 45 (23.9)                  |
| III                                     | 47 (25.0)                  |
| IV                                      | 45 (23.9)                  |
| <b>Smoke preoperatively<sup>2</sup></b> |                            |
| No                                      | 75 (39.9)                  |
| Yes                                     | 113 (60.1)                 |

<sup>1</sup>TNM Staging is referring to the 7th UICC TNM Staging Criteria

<sup>2</sup>Smoker is referring to definition from WHO 1997: at least one cigarette each day continuous or accumulation for six months.



**Supplemental Table S4. COX regression analysis of miR-145-5p/FSCN1 expression combination**

| <b>Prognostic Factor</b> | <b>Regression Coefficient</b> | <b>Standard Error</b> | <b>Wald</b> | <b>P value</b> | <b>Relative Risk (RR)</b> | <b>95.0% CI</b> |
|--------------------------|-------------------------------|-----------------------|-------------|----------------|---------------------------|-----------------|
| miR145(High)/FSCN1(Low)  |                               |                       |             |                | 1.00                      |                 |
| miR145(Low)/FSCN1(Low)   | 0.260                         | 1.23                  | 0.05        | 0.833          | 1.30                      | 0.12~14.42      |
| miR145(High)/FSCN1(High) | 2.70                          | 0.79                  | 11.67       | <b>0.001</b>   | 14.85                     | 3.16~69.85      |
| miR145(Low)/FSCN1(High)  | 2.54                          | 0.77                  | 11.01       | <b>0.001</b>   | 12.69                     | 2.83~56.91      |

**Supplemental Table S5. COX regression analysis of FSCN1 protein expression.**

| <b>Prognostic Factor</b>   | <b>Regression Coefficient</b> | <b>Standard Error</b> | <b>Wald</b> | <b>P value</b>          | <b>Relative Risk (RR)</b> | <b>95.0% CI</b> |
|----------------------------|-------------------------------|-----------------------|-------------|-------------------------|---------------------------|-----------------|
| Age (>60)                  | 0.87                          | 0.30                  | 8.518       | <b><i>0.001</i></b>     | 2.39                      | 1.33~4.29       |
| Neck lymph node metastasis | 1.096                         | 0.28                  | 15.28       | <b><i>&lt;0.001</i></b> | 2.99                      | 1.73~5.19       |
| Distant metastasis         | 2.245                         | 0.52                  | 18.85       | <b><i>0.002</i></b>     | 9.44                      | 3.43~26.01      |
| Smoke preoperatively       | 0.97                          | 0.35                  | 7.55        | <b><i>0.016</i></b>     | 2.65                      | 1.32~5.30       |
| FSCN1 high-expressed       | 2.507                         | 0.64                  | 15.26       | <b><i>0.001</i></b>     | 12.27                     | 3.49~43.19      |

**Supplemental Table S6. Clinical features of LSCC samples underwent DNA methylation analysis.**

| <b>Parameters</b>                       | <b>Number of Cases</b> |
|-----------------------------------------|------------------------|
| <b>Age</b>                              |                        |
| ≤60                                     | 5                      |
| >60                                     | 7                      |
| <b>Sex</b>                              |                        |
| Female                                  | 1                      |
| Male                                    | 11                     |
| <b>Primary cancer site</b>              |                        |
| Glottic                                 | 2                      |
| Supraglottic                            | 8                      |
| Transglottic                            | 2                      |
| <b>Differentiation</b>                  |                        |
| High                                    | 5                      |
| Medium                                  | 4                      |
| Low                                     | 3                      |
| <b>T staging<sup>1</sup></b>            |                        |
| T1                                      | 4                      |
| T2                                      | 1                      |
| T3                                      | 4                      |
| T4                                      | 3                      |
| <b>Cervical lymph node metastasis</b>   |                        |
| N0                                      | 9                      |
| N+                                      | 3                      |
| <b>Distant metastasis</b>               |                        |
| M0                                      | 12                     |
| M1                                      | 0                      |
| <b>Clinical stage</b>                   |                        |
| I                                       | 3                      |
| II                                      | 1                      |
| III                                     | 4                      |
| IV                                      | 4                      |
| <b>Smoke preoperatively<sup>2</sup></b> |                        |
| No                                      | 0                      |
| Yes                                     | 12                     |

<sup>1</sup>TNM Staging is referring to the 7th UICC TNM Staging Criteria

<sup>2</sup>Smoker is referring to definition from WHO 1997: at least one cigarette each day continuous or accumulation for six months.

### **RNA extraction and qPCR analysis**

Total RNA was extracted from frozen cancer tissues by use of TRIzol reagent (Invitrogen). For formalin-fixed paraffin-embedded (FFPE) samples, total RNA was extracted by using the RecoverAll Total Nucleic Acid Isolation Kit for FFPE (Ambion). cDNA was synthesized from total RNA by using the PrimeScript RT Kit (TaKaRa, Dalian, China). qPCR was performed on the ABI 7500 FAST real-time PCR system (Applied Biosystems, Foster City, CA, USA). The procedures for qPCR were 95°C for 30 sec, followed by 40 cycles of 95°C for 10 sec and 60°C for 30 sec. The  $2^{-\Delta\Delta ct}$  method was used to calculate the relative expression level of target genes. U6 RNA and 18S rRNA were served as internal control for miR-145-5p and FSCN1, respectively. The primer sequences used were for Hsa-miR-145 F: ACACTCCAGCTGGGGTCCAGTTTTCCCAGGAA;

Hsa-miR-145 R: CTCAACTGGTGTCTGCGTGA;

U6-F: CTCGCTTCGGCAGCACACA;

U6-R: AACGCTTCACGAATTTGCGT;

FSCN1-F: AGCTGCTACTTTGACATCGA;

FSCN1-R: TCATGAGGAAGAGCTCTGAGT;

18S RNA-F: CCTGGATACCGCAGCTAGGA;

18S RNA-R: GCGGCGCAATACGAATGCCCC.

### **Antibodies**

FSCN1 (Cat#ab126772) and Cyclin D1 (Cat#ab16663) rabbit monoclonal antibodies were purchased from Abcam (Cambridge, MA); GAPDH mouse monoclonal antibody (Cat#HC301) was purchased from TransGen Biotech. (Beijing, China); Cleaved Caspase-3 (Cat#9664S), E-cadherin (Cat#3195S), N-cadherin (Cat#13116S), Vimentin (Cat#5741S), and Snail (Cat#3879S) rabbit monoclonal antibodies were purchased from Cell Signaling Technology, Inc. (Danvers, MA); MMP-2 (Cat#sc-13594) and MMP-9 (Cat#sc-21733) mouse monoclonal antibodies were purchased from Santa Cruz Biotechnology, Inc. (Dallas, TX).

### **Western blot analysis**

Tissue protein lysates were prepared by use of the Tissue Protein Extraction Reagent and Proteasome Inhibition Mixture (Cwbiotech, Beijing) according to the manufacturer's instructions. Cell protein lysates were prepared by using RIPA buffer (Pierce). Protein concentration was determined by using a BCA kit (Cwbiotech). Protein with 2× SDS loading buffer was boiled for 10 min, underwent SDS-PAGE and was transferred to PVDF membranes (Millipore), which were blocked with 5% nonfat milk, then incubated with primary antibody at 4 °C overnight, then horseradish peroxidase-conjugated secondary antibody for 1 h at room temperature. Blots were developed with ECL substrate (Millipore).

### **Generation of reporter constructs**

The wild-type FSCN1-3' UTR reporter construct was constructed by amplifying and inserting the 3' UTR of FSCN1 into the psiCHECK-2 vector. Mutated FSCN1-3' UTR sequences were obtained by overlap extension PCR, and resulting fragments were inserted into psiCHECK-2 to generate mutated reporter constructs. All constructs were verified by DNA sequencing.

### **Luciferase reporter assay**

Luciferase assay involved use of the Dual-Luciferase Reporter Assay System (Promega, Madison, WI) following the manufacturer's instructions. Briefly, after 48-h transfection, growth media was removed and cells were washed gently with PBS twice, then 100 µl/well passive lysis buffer was added with gentle rocking for 15 min at room temperature. Cell lysates were collected for luciferase assay.

### **Immunohistochemistry staining and analysis**



Paraffin sections were dewaxed and re-hydrated in ethanol in descending concentrations (100%, 90%, 80%, 70%). For antigen retrieval, samples were processed in an autoclave for 2 min, 15 sec with sodium citrate (pH 6). Endogenous peroxidase activity was blocked by immersing tissue sections in 3% H<sub>2</sub>O<sub>2</sub> in methanol (v/v) at room temperature for 10 min, then washing with PBS. Nonspecific background staining was reduced by incubating sections with nonimmune goat serum (Boster Co., Wuhan, China) for 15 min at room temperature. Sections were incubated with antibody for FSCN1 (1:200, Vector Laboratories) overnight in a moist chamber at 4 °C and washed 3 times with PBST for 5 min. Sections were incubated with the secondary antibody from the Max Vision HRP-Polymer anti-Mouse IHC kit (MaxinBio, Fuzhou, China) for 15 min at room temperature, then washed 3 times for 5 min with PBST. The DAB substrate detection system was used (Vector Laboratories). Counterstaining was with hematoxylin, then sections were dehydrated and mounted with coverslips. Two independent pathologists, blinded to the clinical parameters, calculated the immunoreactivity score for FSCN1 expression. Immunohistochemical staining was assessed semiquantitatively by the proportion of tumor cells with positive staining and staining intensity. Staining intensity was scored as 0 (no staining), 1 (weak intensity), 2 (moderate intensity) and 3 (strong intensity). Percentage of positive staining tumor cells in tumor tissue was for score 1, ≤ 10%; 2, 11–50%; 3, 51–80%; and 4, 81–100%. The final assessment was calculated as mean combined score for staining intensity and positive-stained cell percentage, ranging from 1 to 7. Specimens were divided into 3 groups of expression by overall scores: negative (1), low expression (2–5), and high expression (6–7). Negative and low-expression specimens were defined as low expression in statistical analysis.

#### **Cell proliferation assay**

Cell proliferation was determined by using the Cell Counting Kit-8 (DOJINDO, Beijing). Moreover, the percentage of cells incorporating EdU was evaluated by using the Cell-Light EdU imaging kit (RiboBio Co., Guangzhou, China).

#### **Cell adhesion assay**

Hep-2 and TU177 cells transfected with miR-145-5p mimic or si-FSCN1 were plated in 96-well plates, then cell adhesion was measured by using the Cell Counting Kit-8 (DOJINDO). The absorbance was measured by using a microplate reader Multiscan MK3 (ThermoFisher Scientific), and background absorbance was corrected by using the CCK-8 solution without cells.

#### **Apoptosis analysis**

Apoptosis analysis of Hep-2 and TU177 cells involved use of the Annexin V Apoptosis Detection Kit I (BD, NJ, USA), and apoptosis was analyzed by FACSCalibur flow cytometry (BD, San Jose, CA, USA). Apoptotic cells in LSCC tumor tissues were detected by using the DeadEnd™ Colorimetric TUNEL System (Promega) following the manufacturer's instructions.

#### **Cell cycle analysis**

An amount of  $1 \times 10^6$  cells was harvested 48 h after transfection and fixed overnight in 70% ice-cold ethanol and 4 °C. Cells were stained with 50 µg/ml propidium iodide (PI), 100 U/ml RNase A, and 0.2% Triton X-100 for 30 min, then quantified by FACSCalibur flow cytometry (BD), and data were analyzed by using ModFit software.

#### **Transwell migration assay**

After transfection,  $1 \times 10^6$  cells were plated in 100 µl DMEM-F12 medium without serum, then incubated in Transwell plates at 37 °C and 5% CO<sub>2</sub> for 24 h and 48 h; the upper side of the filter membrane was wiped with a cotton swab to remove the cell debris. Cells on the lower side of the insert

filter were stained with crystal violet for 10 min. The absorbance at OD570 was measured by using the microplate reader Multiscan MK3 (ThermoFisher Scientific).

#### Cell invasion assay

Matrigel was thawed at 4 °C, then 40 µl Matrigel solution (Matrigel : medium=1:3) was added to a precooled Transwell insert and solidified in a 37°C incubator for 2 h to form a thin gel layer. Cells were resuspended with serum-free medium at  $1 \times 10^5$  cells/well. The upper side of the filter membrane was wiped with a cotton swab to remove cell debris, then cells on the lower side of the insert filter were stained with crystal violet for 10 min and washed with PBS once. The absorbance at OD570 was measured by using the microplate reader Multiscan MK3.

#### Microscopy imaging and staining

Images were captured by using the JSM-6360LV scanning electron microscope (JEOL, Tokyo). F-actin staining was performed using Rhodamine-Phalloidin (Cytoskeleton, Inc., Denver, CO.) according to the manufacturer's instructions. Briefly, fixed cells were incubated with 200 µl Rhodamine-Phalloidin (200 nM), counterstained with DAPI (Sigma) and imaged by using a confocal laser-scanning microscope (Leica TCS SP8).

#### Laser capture microdissection

Frozen sections of LSCC or paired ANM fresh tissue was stained with Histogene staining solution (Thermo Fisher Scientific, Waltham, MA) and dehydrated in ascensional concentrations ethanol (70%, 80%, 90%, 100%). Laser capture microdissection was performed on Leica LMD6500 laser microdissection Systems (Leica Microsystems CMS GmbH, Wetzlar, Germany).

#### Primer sequences for DNA methylation of miR-145 promoter

1. Primer sequence for Massarray methylation analysis of miR-145 promoter

F: AGGAAGAGAGAGAGAGGAAGTTGTAAATTTAGGT-3'

R: CAGTAATACGACTCACTATAGGGAGAAGGCTAATTTAAAACATAATTCATAAACCT

2. Primer sequences for pyrosequencing methylation analysis of miR-145 promoter

| Amplified fragments | Primer name         | Nucleotide sequence             |
|---------------------|---------------------|---------------------------------|
| Fragment 1          | miR-145-F1          | TTGGTAGGAGATTGGGGAATAT          |
|                     | miR-145-R1          | Biotin-CTCTTCTACATCCAACCCCATCTA |
|                     | Sequencing Primer 1 | AGTTTTGGGGGTGGG                 |
| Fragment 2          | miR-145-F2          | TTGGTAGGAGATTGGGGAATAT          |
|                     | miR-145-R2          | Biotin-CTCTTCTACATCCAACCCCATCTA |
|                     | Sequencing Primer 2 | TTATTTTTTTTGAGAGTAATAA          |
| Fragment 3          | miR-145-F3          | GGTTGGATGTAGAAGAGAATTT          |
|                     | miR-145-R3          | Biotin-TTCCAAAAATCCCATCTTAA     |
|                     | Sequencing Primer 3 | TTAGTTGGTTTTTAGGGATA            |
